# Supplementary material for: Nanotemplate-directed DNA segmental thermal motion
Source: Royal Society of Chemistry journal article supplement (doi:10.1039/c6ra14383k), 2016-01-01
Supplement: c6ra14383k7.pdf [file c6ra14383k7.pdf]

Electronic Supplementary Information file 1 for the article

## **Nanotemplate-directed DNA segmental thermal motion**

E. V. Dubrovin,<sup>a,b†</sup> Marc Schächtele<sup>b</sup> and T. E. Schäffer<sup>b</sup>

<sup>a</sup>Lomonosov Moscow State University, Faculty of Physics, Leninskie gory, 1/2, 119991 Moscow, Russian Federation.

<sup>b</sup>University of Tübingen, Institute of Applied Physics, Auf der Morgenstelle 10, 72076 Tübingen, Germany.

<sup>†</sup>Corresponding author email: [dubrovin@polly.phys.msu.ru](mailto:dubrovin@polly.phys.msu.ru)

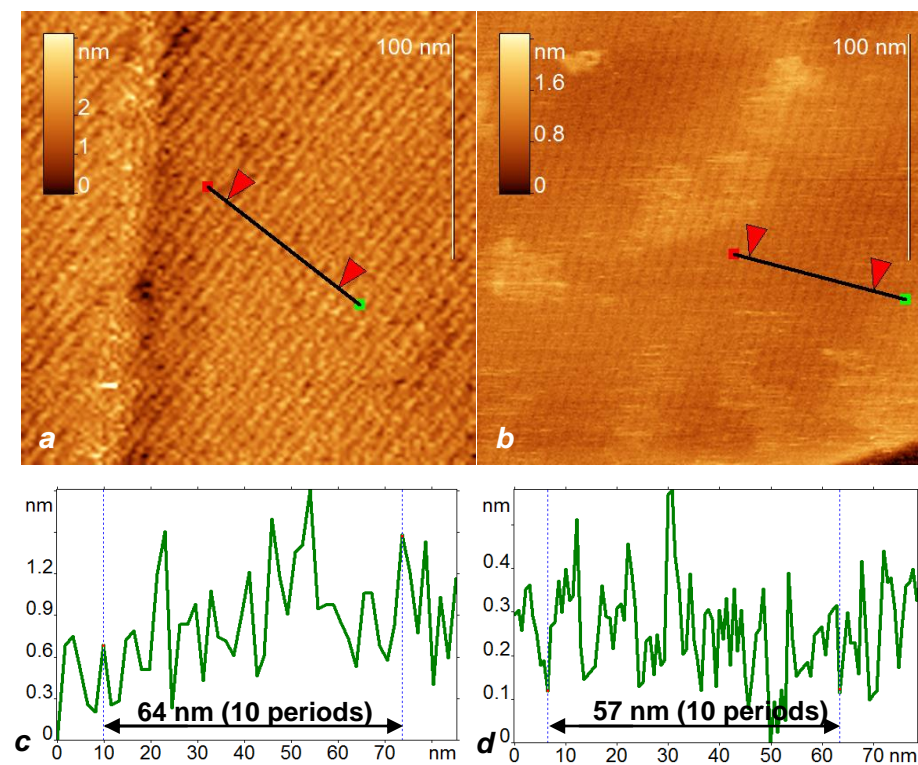

**Figure S1.** AFM height images of (a) stearylamine and (b) stearic acid nanotemplates on HOPG obtained in 5 mM NaCl solution; (c) and (d) cross-sections along the black line on the corresponding AFM images. The size of the images is 200×200 nm.

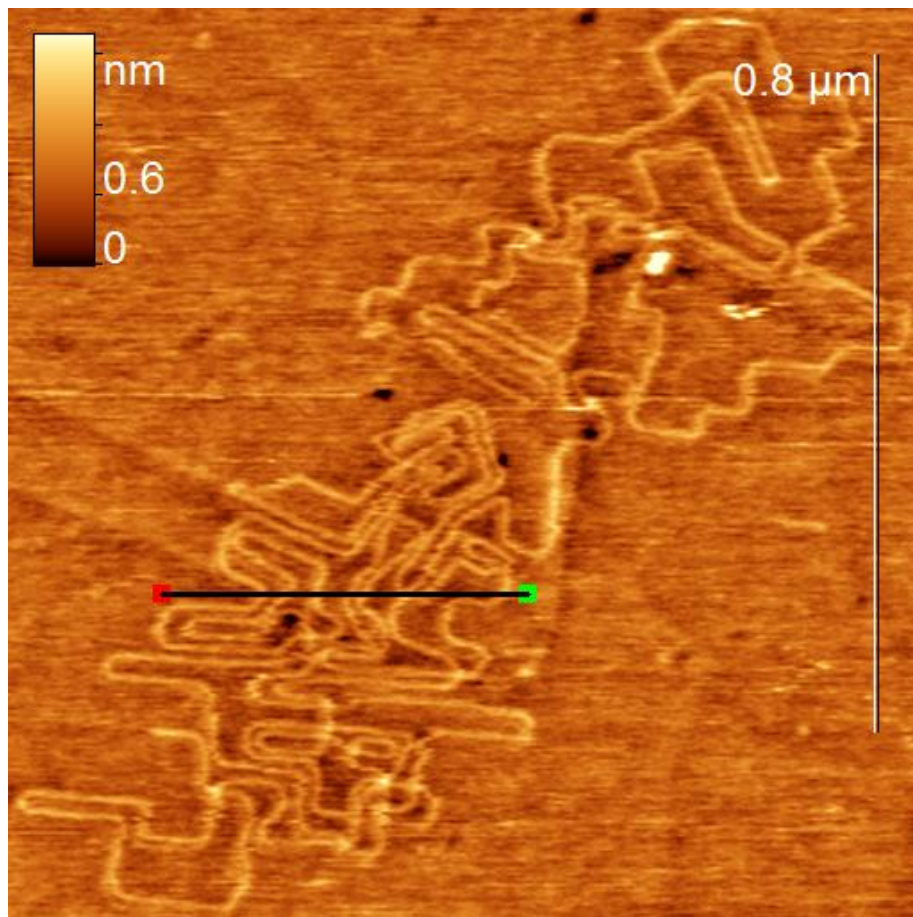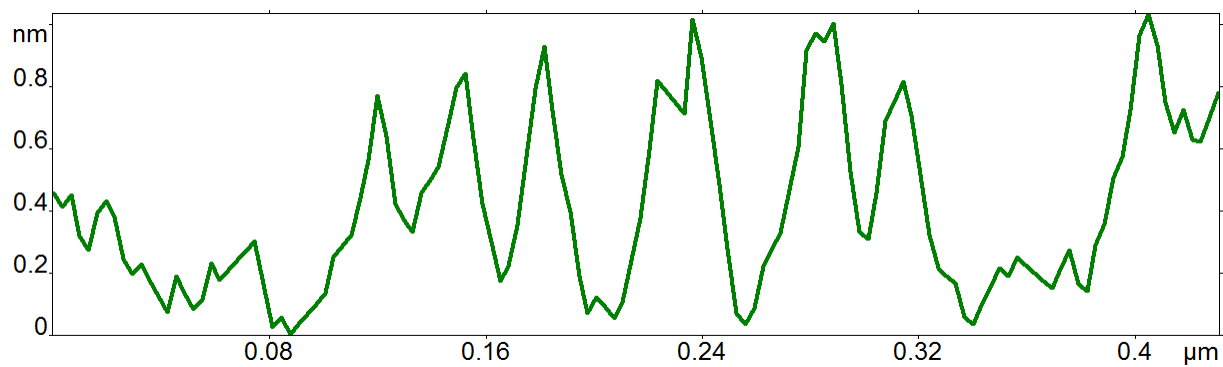

**Figure S2.** AFM height image of phage (top) T7 DNA fragment adsorbed onto stearylamine nanotemplate on HOPG from 5 mM NaCl solution and height profile (bottom) along the black line on the AFM image. The size of the image is  $1 \times 1 \mu\text{m}$ .

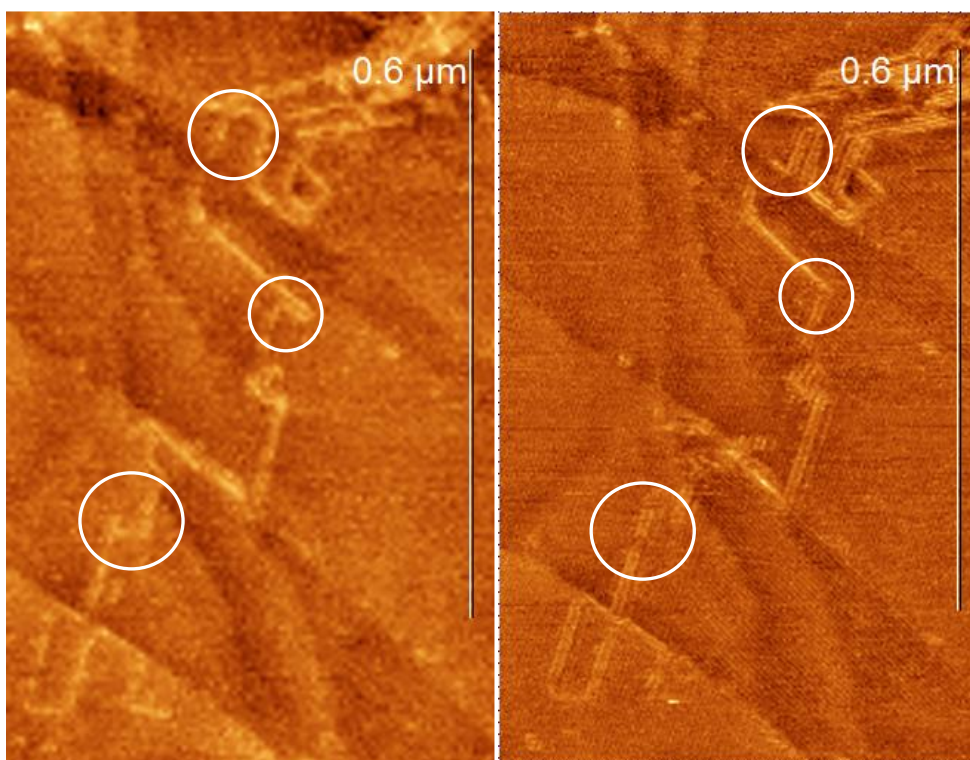

**Figure S3.** Two successive AFM height images of a phage T7 DNA fragment adsorbed on a stearylamine nanotemplate on graphite in 5 mM NaCl solution obtained in PeakForce mode. The time interval between acquisition of the AFM images was 9 minutes. Three regions with the most pronounced change of the position of DNA fragments are encircled.
